# Supplementary material
Source: PubMed Central journal article supplement (PMC8961396)
Supplement: jamaneurol-e220231-s001.pdf [file jamaneurol-e220231-s001.pdf]

1

**Supplement 1**

2

**Study Protocol**

3

Table of Contents

4

1. Summary of changes to protocol or statistical analysis plan

5

2. Study protocol

6

7

8           **1. Summary of changes to the protocol and statistical analysis plan**

9    We made 3 minor changes to our initial protocol. The first, we initially stated the baseline period  
10 would be 1 week (7 days), which was an error. We submitted a modification to change the  
11 baseline period from 7 days to 14 days to be consistent with previous work. This was done  
12 before enrollment opened. Second, our initial protocol stated that we would exclude individuals  
13 with a history of cerebellar stroke. We removed this criteria as having a cerebellar stroke does  
14 not increase risk to participants. We also initially stated that we would include people up to 3  
15 years post-stroke, however, we removed this upper limit as there was not scientific reason to  
16 exclude those who had experienced a stroke more than three years before enrollment. Lastly,  
17 we added the option to call participants for recruitment, in addition to sending an email, after  
18 discovering that some individuals did not have an email address listed within the Penn Medicine  
19 system.

20

21    There were not changes to the analysis plan.

22

23

## 2. Study Protocol

24

**Using Behavioral Economics to Improve Mobility for Adults with Stroke**

25

26

IRB Protocol

27

November 2020

28

29

## Outline

- 30 1. Introduction and purpose
- 31 2. Objectives
- 32 3. Specific Aims
  - 33 a. Primary outcome
  - 34 b. Secondary outcome
  - 35 c. Exploratory outcome
- 36 4. Study design
  - 37 a. Design
  - 38 b. Study duration
  - 39 c. Target population
  - 40 d. Accrual
  - 41 e. Randomization procedures
  - 42 f. Key inclusion criteria
  - 43 g. Key exclusion criteria
- 44 5. Subject recruitment
- 45 6. Subject compensation
- 46 7. Study procedures
  - 47 a. Consent
  - 48 b. Procedures
- 49 8. Analysis plan
- 50 9. Investigators
- 51 10. Human research protection
  - 52 a. Data confidentiality
  - 53 b. Subject confidentiality
  - 54 c. Subject privacy

|    |                               |
|----|-------------------------------|
| 55 | d. Data disclosure            |
| 56 | e. Data safety and monitoring |
| 57 | 11. Risk/benefit              |
| 58 | a. Potential study risks      |
| 59 | b. Potential study benefits   |
| 60 | c. Risk/benefit assessment    |
| 61 |                               |

62

## 1. Introduction and Purpose

63 Stroke is the leading cause of complex, long-term disability.<sup>1,2</sup> Every year, the United  
64 States spends approximately \$45 billion on direct and indirect stroke-related costs, a  
65 number projected to more than double to \$95 billion over the next 15 years.<sup>2,3</sup> Over half  
66 of survivors fail to meet physical activity guidelines<sup>4</sup> and survivors average between  
67 2608 and 4616 steps per day.<sup>5,6</sup> Regular physical activity after stroke can help prevent  
68 cardiovascular deconditioning, muscle loss, and secondary strokes,<sup>4,7</sup> but novel  
69 interventions to improve daily physical activity post-stroke are neither well-studied nor  
70 well-defined. The purpose of this proposed study addresses the above limitations by  
71 delivering a novel mobility intervention with daily step goals using wearable technology  
72 and the principles of behavioral economics to help improve mobility for adults with  
73 stroke. This pilot, randomized controlled trial utilizes the Way to Health platform to  
74 deliver a supportive partner and gamification intervention, leveraging social incentives, to  
75 help increase mobility. This medically complex population will likely vary in their overall  
76 mobility and responsiveness to the intervention as a result of individual and behavioral  
77 factors. The proposed study includes assessments to quantify the unique individual and  
78 behavioral factors that may influence responsiveness. Together, results from this project  
79 will provide important pilot data for a future clinical trial to improve mobility in adults with  
80 stroke.

81

## 2. Objectives

82

83  
84 The overall objective of this study is to evaluate the feasibility of a connected health  
85 mobility intervention for community-dwelling adults with stroke. We will examine the  
86 outcomes of an 8 week mobility intervention on steps per day. Additionally, we will  
87 explore individual phenotypes as they relate to intervention responsiveness, which will  
88 inform a future clinical trial.

89

## 3. Aims

90

### a. Primary outcome

91

92 The **primary outcome** variable will be the mean difference in change in daily steps  
93 between baseline and the 8 week intervention period.

94

### b. Secondary outcome

95

96 The **secondary outcomes** will be the proportion of days the gamification arm  
97 participants met their step goal.

98

### c. Exploratory outcomes

99

100 We will also assess indicators of acceptability and feasibility of our intervention including  
101 adherence to wearing the activity tracker and interacting with the Way to Health platform,  
102 and how behavioral and clinical factors may influence mobility.

103

104

105

106

107

108

## 4. Study design

109  
110  
111  
112  
113  
114  
115  
116  
117  
118  
119  
120  
  
121  
122  
123  
124  
125  
126  
127  
128  
129  
130  
131  
132  
133  
134  
135  
136  
137  
138  
139  
140  
141  
142  
143  
144  
145  
146  
147  
148  
149  
150  
151  
152  
153  
154  
155  
156  
157

a. *Design*

We will conduct a two-arm, prospective, pilot randomized controlled trial comparing a control group that uses a wearable device to track steps per day and selects a daily step goal they will be asked to reach throughout the study to a gamification arm that uses the same wearable device and receives a gamification/support partner intervention to adhere to a step goal program. All participants' step counts will be quantified using wearable devices (Fitbit) and stored securely via the Way to Health platform. Participants are not required to interact with the device in order for step data to be collected; however, they will need to sync the device with their smartphone periodically so they can see their step count and so that these data can be transmitted to the Way to Health platform.

Participants in the gamification arm will participate in a gamification/support partner intervention to improve mobility. There are three key components to this intervention. First, all intervention participants will be asked to sign an electronic pre-commitment pledge. This simple pledge asks participants to indicate they will strive to achieve their daily step goal during the study. Signing a pre-commitment pledge helps improve motivation.<sup>8,9</sup>

Second, at the beginning of every week, gamification participants will receive 70 points in a virtual account. For every day participants do not meet their step goal, 10 points will be deducted from their account. On days when participants meet their step goal, they will keep their points. At the end of the week, participants with at least 40 points will advance a level in the game. Consistent with previous work, there are 5 levels (blue, bronze, silver, gold, and platinum) and all participants will start at the silver level. Participants who do not have 40 points in their virtual account at the end of each week will drop a level in the game. Participants will receive a daily text message informing them if they met their step goal the previous day to provide immediate performance feedback.

Lastly, gamification participants will identify a support partner (spouse, friend, family member) who will receive weekly updates of their progress in the game. This leverages social incentives which can help improve motivation to reach goals. Participants will provide the name, email address, and phone number of their chosen support partner for the duration of the 8 week intervention. Prior to the intervention phase of the study, we will arrange a three-way phone call with the participant, support partner, and a member of the study team. During this phone call, we will explain the rules of the gamification intervention and ask the participant and support partner to create 3 goals or strategies for how the support partner can encourage and support the participant during the 8 week intervention. These 3 goals will be included in the weekly email to the support partner. Participants who are at the blue level in the game at week 4 (halfway through the intervention) will be contacted and asked to participate in an additional three-way phone call with their support partner and a member of the research team to discuss new ways the support partner can help the participant achieve their step goals. Participants who are unable to identify a support partner will be paired with a member of the research team.

158 The intervention will stop after 8 weeks. We will also arrange a one-time phone  
159 call with participants in the control group to discuss the study and answer any  
160 questions they may have prior to the 8 week intervention period.  
161

162 *b. Duration*

163 This study is anticipated to take approximately 18 months to complete including  
164 study preparation, recruitment, participant interventions, data analysis, and  
165 dissemination of findings. The length of enrollment for individual participants will  
166 be approximately 10 weeks (slightly longer for participants who need an  
167 extended baseline period).  
168

169 *c. Target population*

170 The target population for this study are adults  $\geq 18$  years of age who discharged  
171 from any Penn affiliated hospital  $>3$  months after their initial stroke. Participants  
172 who ambulate in the community without assistance from another person (Life  
173 Space Assessment level 3) and sufficient cognitive ability will be included in this  
174 study. Sufficient cognitive ability will be determined using the Mini Montreal  
175 Cognitive Assessment (Mini MoCA), a validated, 5-minute telephone based  
176 assessment. Participants with a total score  $\geq 11$  points will be eligible to  
177 participate.  
178

179 *d. Accrual*

180 This pilot will enroll 50 participants. A total of 25 participants will be randomized  
181 to the control group and 25 participants will be randomized to the gamification  
182 arm. The target population will be identified via PennChart using ICD-10 and  
183 stroke-related diagnosis related group (DRG) codes. A secondary approach  
184 includes a recruitment flyer posted within Penn Neurology Clinic and Penn  
185 outpatient physical rehabilitation centers.  
186

187 *e. Randomization procedures*

188 Participants will be randomized in block sizes of 2 to the control or gamification  
189 arm using a stratified randomization approach. Participants will be stratified using  
190 age ( $>65$  years) and baseline step count (1000-2499, 2500-4999 steps, 5000-  
191 7499 steps). Randomization will occur using the Way to Health platform.  
192

193 *f. Key inclusion criteria*

- 194 1) Age 18 or older
- 195 2) Ability to provide informed consent
- 196 3) History of ischemic or hemorrhagic stroke (confirmed with ICD-10 or DRG  
197 code) at least 3 months prior to enrollment
- 198 4) Life Space Assessment mobility level 3
- 199 5) Ability to ambulate outside of their home (self-reported)
- 200 6) Owns a smartphone or tablet compatible with required applications for the  
201 wearable tracking device
- 202 7) Sufficient cognitive ability to participate (5-minute Montreal Cognitive  
203 Assessment Score  $\geq 11$  points)  
204



- 205 g. *Key exclusion criteria*  
206 1) Inability to provide informed consent, illiteracy or inability to speak, read,  
207 and write English  
208 2) Self-reported history of falls within the last 3 months  
209 3) Severe cognitive impairment (MoCA score  $\leq$  10 points)  
210 4) Medical condition that may limit participation in physical activity program  
211 (e.g. metastatic cancer, end-stage renal disease)  
212 5) Currently institutionalized in skilled nursing or long-term care facility  
213 7) Baseline step count > 7500/day  
214 8) Currently receiving physical therapy services  
215

## 216 5. Subject recruitment

217 Eligible participants will be identified within the electronic health record and Penn  
218 Data Store, the health system's clinical data warehouse, by ICD-10 codes  
219 consistent with ischemic or hemorrhagic stroke (160, 161, 162, 163, 164) or  
220 stroke diagnosis related group (DRG, 061, 062, 063). Participants meeting the  
221 ICD-10 and DRG criteria will be invited to participate by email or phone.  
222 Additionally, we will post recruitment flyers within Penn Neurology clinics and  
223 Good Shepherd Penn Partners outpatient physical rehabilitation clinics.  
224 Interested participants will be allowed to take a flyer that provides instructions for  
225 what to do if interested in participating.  
226

## 227 6. Subject compensation

228 All participants will be compensated \$30 for participating in the study via  
229 Greenphire Clin Card. All participants will receive \$30 at the end of the  
230 intervention period. Financial payments will be sent to the participant via  
231 Greenphire ClinCard using the Way to Health platform.  
232

233 Additionally, all participants will be allowed to keep their Fit Bit device.  
234

## 235 7. Study procedures

### 236 a. *Consent*

237 Eligible participants will be contacted via email, phone, or recruitment flyer.  
238

239 Individuals who are interested in learning more about the study will be  
240 directed to the Way To Health web portal. Upon reaching the portal, potential  
241 participants will be asked to create an account and will then be informed of  
242 the details of the study, including its objectives, duration, requirements, and  
243 financial payments. If participants are still interested in participating, the Way  
244 To Health portal will take them through an automated online informed  
245 consent. The consent document will be divided into sections and potential  
246 participants will have to click a button to advance through each section. This  
247 is to help ensure that participants read the consent form thoroughly by  
248 breaking down the form into manageable blocks of text. Each section will  
249 have a button allowing the user to contact a researcher via email or by  
250 telephone if they have questions about the consent form. Successive screens  
251 will explain the voluntary nature of the study, the risks and benefits of

252 participation, alternatives to participation, and that participants can withdraw  
253 from the study at any time. On the final consent screen, potential participants  
254 who click a clearly delineated button stating that they agree to participate in  
255 the study will be considered to have consented to enroll. Participants will be  
256 provided with details regarding how to contact the research team via email or  
257 phone at any time if they subsequently wish to withdraw from the study. This  
258 contact information will remain easily accessible via the participants'  
259 individual Way To Health web portal dashboards throughout the study.

260  
261

*b. Procedures*

262 After providing informed consent, participants will complete an online screening  
263 assessment where we will ask about their current mobility level and history of  
264 falls. Participants who pass the initial online screen will then complete a  
265 demographics form. We will call participants to administer the Mini MoCA  
266 assessment to assess cognition as the final screening procedure. Participants  
267 with sufficient cognitive ability will then complete the baseline questionnaires via  
268 the Way to Health platform. Participants who do not pass the initial screen will be  
269 contacted by a member of the study team to discuss their screening results and  
270 explain ineligibility.

271 After enrollment and the completion of baseline questionnaires, participants will  
272 be mailed a wearable device with detailed instructions for set-up. We will also  
273 provide contact information for the study team so participants can contact us with  
274 set-up questions. Participants will be instructed to wear the device for 14 days as  
275 the baseline period. We will calculate a baseline step value for all participants.  
276 Participants will then be randomized into the control or gamification arm.

277 The control arm will participate in a one-time phone call with a member of the  
278 study team, prior to the 8 week intervention period, to review the study and  
279 answer any questions. Additionally, participants in the control arm will select a  
280 daily step goal at the beginning of the study and be able to see their daily steps  
281 using the Fitbit application. The control arm will receive no further communication  
282 during the intervention period. Participants in the gamification arm will have an  
283 individualized step goal and participate in a gamification/support partner  
284 intervention, to help meet their daily step goal. Gamification uses game design  
285 elements such as points and levels to help increase motivation for behavior  
286 change.<sup>10-12</sup> Consistent with previous work, we will have 5 levels (blue, bronze,  
287 silver, gold, and platinum), and all participants will start at the silver level. At the  
288 beginning of each week, participants will receive 70 points in a virtual account.  
289 During the week, if a participant does not meet their step goal they will lose 10  
290 points and if they meet their step goal, they keep their points. At the end of each  
291 week, participants with at least 40 points in their account will advance a level  
292 while participants with less than 40 points will drop a level. We will send a weekly  
293 e-mail message to the support partner at the end of every week updating that  
294 person on their loved one's progress in the game. Additionally, we will arrange a  
295 three-way phone call prior to the start of the intervention with the participant, their  
296 support partner, and a member of the research team to discuss the study. During

297 this call, the participant and their support partner will be asked to identify three  
298 goals or strategies for how the support partner can support the participant during  
299 the study. These three goals will be included in the weekly email to each support  
300 partner. This leverages social incentives, which can help improve motivation to  
301 meet goals or change behavior. Participants who are at the blue level at week 4  
302 (halfway through the intervention) will be contacted by the study team to arrange  
303 a three-way phone call with the participant and the support partner to discuss  
304 new goals or strategies for how the support partner can help support the  
305 participant to meet their goals over the final 4 weeks of the study. Participants  
306 who are unable to identify a support partner will be paired with a member of the  
307 research team.

308 Participants will complete the study at the end of the 8 week intervention and  
309 there are no follow-up visits.

## 310 **8. Analysis plan**

311 All analyses will be performed using intention-to-treat. Data can be missing for  
312 any day if the participant did not use the activity-tracking device, did not upload  
313 data, or have a daily step count that is less than 1000 steps. For the main  
314 analysis, we will use multiple imputation for step values that are missing. We will  
315 perform five sets of imputations and results will be combined using Rubin's  
316 standard rules. To test of the robustness of our findings we will also evaluate  
317 models using collected data without imputation.

318  
319 The primary analysis will fit linear mixed effect regression models to evaluate  
320 changes in physical activity from baseline during the intervention period between  
321 the gamification and control group, using study day as a fixed effect and  
322 participant as a random effect to take into account clustering from repeated  
323 observations of participant step counts. We will compare differences in the  
324 average steps per day between the control and intervention group. Generalized  
325 linear models will be used to test the difference in proportion of days participants  
326 in the intervention arm met their step goal, compared to the control group. Our  
327 exploratory analyses will fit mixed effect regression models adjusted for other  
328 variables of interest such as participant characteristics (social support, balance  
329 confidence). We will test for changes in self-efficacy and balance confidence  
330 from pre-intervention to post-intervention using a paired samples t-test.

## 331 332 **9. Investigators**

333 Ryan Greysen, MD, MHS, MA is the Principle Investigator (PI). He is Chief of the  
334 Section of Hospital Medicine in the Division of General Internal Medicine and an  
335 Assistant Professor of Medicine at the Perelman School of Medicine at the  
336 University of Pennsylvania. He has past experience leading studies of older,  
337 hospitalized adults focused on functional vulnerability and outcomes including  
338 hospital readmission. He currently spends 75% of his effort on research and 25%  
339 on clinical and administrative activities.

340  
341 Mitesh Patel, MD, MBA, MS (Co-Investigator ) is an Assistant Professor of  
342 Medicine and Health Care Management at the Perelman School of Medicine and

343 The Wharton School at the University of Pennsylvania. He has past experience  
344 leading six clinical trials using the Way to Health Platform to deploy interventions  
345 using financial and social incentives to promote weight loss and increased  
346 physical activity. He currently spends 80% of his effort on research and 20% on  
347 clinical and teaching activities.

348  
349 Kimberly Waddell, PhD, OTR/L is an advanced postdoctoral fellow at the  
350 Crescenz VA Medical Center and the Penn Medicine Nudge Unit. She has nine  
351 years' experience as an occupational therapist and has extensive experience  
352 with recruiting individuals with stroke for research studies. She currently spends  
353 100% of her effort on research.

## 354 **10. Human research protection**

### 355 *a. Data confidentiality*

356 Paper-based records will be kept in a secure location and only be accessible to  
357 personnel involved in the study. Computer-based files will only be made available  
358 to personnel involved in the study through the use of access privileges and  
359 passwords. Wherever feasible, identifiers will be removed from study-related  
360 information. Precautions are in place to ensure the data are secure by using  
361 passwords and encryption, because the research involves web-based surveys.  
362  
363

### 364 *b. Subject confidentiality*

365 Research material will be obtained from participant surveys, from the wearable  
366 devices, and from the electronic health record. The data to be collected include  
367 demographic data (e.g., age, sex, self-identified race), outcome data, and daily  
368 activity data collected by the wearable device. Research material that is  
369 obtained will be used for research purposes only. The same procedure used for  
370 the analysis of automated data sources to ensure protection of patient  
371 information will be used for the survey data, in that patient identifiers will be used  
372 only for linkage purposes or to contact patients. The study identification number,  
373 and not other identifying information, will be used on all data collection  
374 instruments. All study staff will be reminded to appreciate the confidential nature  
375 of the data collected and contained in these databases. The Penn Medicine  
376 Academic Computing Services (PMACS) will be the hub for the hardware and  
377 database infrastructure that will support the project and is where the Way to  
378 Health web portal is based. The PMACS is a joint effort of the University of  
379 Pennsylvania's Abramson Cancer Center, the Cardiovascular Institute, the  
380 Department of Pathology, and the Leonard Davis Institute. The PMACS provides  
381 a secure computing environment for a large volume of highly sensitive data,  
382 including clinical, genetic, socioeconomic, and financial information. Among the  
383 IT projects currently managed by PMACS are: (1) the capture and organization of  
384 complex, longitudinal clinical data via web and clinical applications portals from  
385 cancer patients enrolled in clinical trials; (2) the integration of genetic array  
386 databases and clinical data obtained from patients with cardiovascular disease;  
387 (3) computational biology and cytometry database management and analyses;  
388 (4) economic and health policy research using Medicare claims from over 40  
389 million Medicare beneficiaries. PMACS requires all users of data or applications

390 on PMACS servers to complete a PMACS-hosted cybersecurity awareness  
391 course annually, which stresses federal data security policies under data use  
392 agreements with the university. The curriculum includes Health Insurance  
393 Portability and Accountability Act (HIPAA) training and covers secure data  
394 transfer, passwords, computer security habits and knowledge of what constitutes  
395 misuse or inappropriate use of the server. We will implement multiple, redundant  
396 protective measures to guarantee the privacy and security of the participant data.  
397 All investigators and research staff with direct access to the identifiable data will  
398 be required to undergo annual responsible conduct of research, cybersecurity,  
399 and HIPAA certification in accordance with University of Pennsylvania  
400 regulations.

401  
402 Data will be stored, managed, and analyzed on a secure, encrypted server  
403 behind the University of Pennsylvania Health System (UPHS) firewall. This  
404 server was created for projects conducted by the Penn Medicine Nudge Unit  
405 related to physician and patient behavior at UPHS. All study personnel that will  
406 use this data are listed on the IRB application and have completed training in  
407 HIPAA standards and the CITI human subjects research. Data access will be  
408 password protected. Whenever possible, data will be de-identified for analysis.  
409

410 *c. Subject privacy*

411 Enrollment will include a description of the voluntary nature of participation, the  
412 study procedures, risks and potential benefits in detail. The enrollment procedure  
413 will provide the opportunity for potential participants to ask questions and review  
414 the consent form information with family or caregivers prior to making a decision  
415 to participate. Participants will be told that they do not have to answer any  
416 questions if they do not wish and can drop out of the study at any time, without  
417 affecting their medical care or the cost of their care. They will be told that they  
418 may or may not benefit directly from the study and that all information will be kept  
419 strictly confidential, except as required by law. Subjects will be given a copy of  
420 the consent document. All efforts will be made by study staff to ensure subject  
421 privacy.  
422

423 *d. Data disclosure*

424 The following entities, besides the members of the research team, may receive  
425 protected health information (PHI) for this research study: -Wells Fargo, the  
426 company which processes study-related payments. Patient addresses and  
427 account balances will be stored on their secure computers. -Fit Bit, the company  
428 that designs and manufactures the wearable devices used in the study to track  
429 participant physical activity. -Twilio, Inc., the company which processes some  
430 study-related messages. Twilio will store patients' phone numbers on their secure  
431 computers. -Qualtrics, Inc., the company which processes most study-related  
432 surveys. Qualtrics will house de-identified answers to these surveys on their  
433 secure servers. -The Office of Human Research Protections at the University of  
434 Pennsylvania -Federal and state agencies (for example, the Department of  
435 Health and Human Services, the National Institutes of Health, and/or the Office

436 for Human Research Protections), or other domestic or foreign government  
437 bodies if required by law and/or necessary for oversight purposes.

438

439 e. *Data safety and monitoring*

440 At the time of enrollment, all patients will be given anticipatory guidance on when  
441 to seek medical attention (e.g. when to call their doctor should they feel dizzy,  
442 short of breath, chest pain, lightheaded, unstable, or otherwise unwell while  
443 ambulating). In addition, participants will be asked to report to the study team  
444 any episodes of these symptoms that occur during the study period (the research  
445 assistant/study coordinator will check in periodically with enrolled patients to  
446 ensure devices are working properly and troubleshoot any issues encountered by  
447 patients/caregivers). Patients/caregivers will also be reminded that they can  
448 always contact the study team by phone or email at any time (contact information  
449 will be given at the beginning of the study and will also be posted on the Way to  
450 Health platform, which can be accessed at any time by the participant). If any  
451 concerns of a participant event are identified, the study coordinator will reach out  
452 to the participant and complete the event reporting form. This form will be  
453 reviewed with the study PI to determine if any action is needed and if the  
454 participant can continue safely in the study. Any identified adverse events will be  
455 reported to the Institutional Review Board.

456 **11. Risk/benefit**

457 a. *Potential study risks*

458 The major potential risk of this study is a breach of participant confidentiality. We  
459 will minimize this risk of confidentiality breach by linking individual identifying  
460 information with participant ID numbers only in one single secure file that will only  
461 be accessed by the study team in the case of an adverse medical event,  
462 participant dropout, or if otherwise deemed necessary by the Principal  
463 Investigator. All other identifying information will be discarded after initial contact  
464 with the Study Coordinator. All other members of the research team will be able  
465 to view only participant ID numbers. Additionally, participants will receive  
466 guidance from the research coordinator on when to seek medical attention (call  
467 for their nurse or doctor in the hospital) if they experience discomfort or increased  
468 fatigue with physical activity. While unexpected, another potential risk for this  
469 study is a risk for falls. We have mitigated this risk by recruiting a sample that can  
470 ambulate within the community without physical assistance without history of a  
471 recent fall. Our target population is higher functioning, which has been previously  
472 shown to have a low fall risk compared to individuals who are moderate to  
473 severely impaired.<sup>13,14</sup>

474

475 b. *Potential study benefits*

476 Through participation in this study, each participant will have the potential to  
477 increase their physical activity, which could improve their health and reduce their  
478 risk for functional decline, secondary stroke, falls, nursing home placement, or  
479 hospital readmission. If this approach is effective, it could have tremendous  
480 benefits for society if adopted on a wide scale to help this vulnerable population  
481 increase their physical activity. It is expected that other people will gain

482 knowledge from this study and that participation could help understand how to  
483 effectively motivate people to become more physically active. Participants may  
484 also receive no benefit from their participation in the study.

485

486 c. *Risk/benefit assessment*

487 Anticipated risks of this study should be minimal and the risk/benefit ratio is very  
488 favorable. To minimize the chance for serious and unexpected adverse events,  
489 study participants will be screened through exclusion criteria. Participants that  
490 increase physical activity may improve their health and reduce their risk for  
491 functional decline, secondary stroke, or falls.

492

493

494 **References**

495

- 496 1. Adamson J, Beswick A, Ebrahim S. Is stroke the most common cause of disability? *J*  
497 *Stroke Cerebrovasc Dis.* 2004;13(4):171-177.
- 498 2. Benjamin Emelia J., Muntner Paul, Alonso Alvaro, et al. Heart Disease and Stroke  
499 Statistics—2019 Update: A Report From the American Heart Association. *Circulation.*  
500 2019;139(10):e56-e528. doi:10.1161/CIR.0000000000000659
- 501 3. Benjamin EJ, Virani SS, Callaway CW, et al. Heart disease and stroke statistics-2018  
502 update: a report from the American Heart Association. *Circulation.* 2018;137(12):e67.
- 503 4. Rand D, Eng JJ, Tang PF, Jeng JS, Hung C. How active are people with stroke? Use of  
504 accelerometers to assess physical activity. *Stroke.* 2009;40(1):163-168.
- 505 5. Mudge S, Barber PA, Stott NS. Circuit-based rehabilitation improves gait endurance but  
506 not usual walking activity in chronic stroke: a randomized controlled trial. *Arch Phys Med*  
507 *Rehabil.* 2009;90(12):1989-1996.
- 508 6. Michael K, Goldberg AP, Treuth MS, Beans J, Normandt P, Macko RF. Progressive  
509 adaptive physical activity in stroke improves balance, gait, and fitness: preliminary results.  
510 *Top Stroke Rehabil.* 2009;16(2):133-139.
- 511 7. Billinger SA, Arena R, Bernhardt J, et al. Physical activity and exercise recommendations  
512 for stroke survivors: a statement for healthcare professionals from the American Heart  
513 Association/American Stroke Association. *Stroke.* 2014;45(8):2532-2553.
- 514 8. Ariely D, Wertenbroch K. Procrastination, deadlines, and performance: self-control by  
515 precommitment. *Psychol Sci.* 2002;13(3):219-224. doi:10.1111/1467-9280.00441
- 516 9. Rogers T, Milkman KL, Volpp KG. Commitment devices: using initiatives to change  
517 behavior. *JAMA.* 2014;311(20):2065-2066. doi:10.1001/jama.2014.3485
- 518 10. Edwards EA, Lumsden J, Rivas C, et al. Gamification for health promotion: systematic  
519 review of behaviour change techniques in smartphone apps. *BMJ Open.*  
520 2016;6(10):e012447.
- 521 11. Kawachi I. It's all in the game—The uses of gamification to motivate behavior change.  
522 *JAMA Intern Med.* 2017;177(11):1593-1594.
- 523 12. Patel MS, Small DS, Harrison JD, et al. Effectiveness of Behaviorally Designed  
524 Gamification Interventions With Social Incentives for Increasing Physical Activity Among  
525 Overweight and Obese Adults Across the United States: The STEP UP Randomized  
526 Clinical Trial. *JAMA Intern Med.* 2019;179(12):1624-1632.  
527 doi:10.1001/jamainternmed.2019.3505
- 528 13. Wei WE, De Silva DA, Chang HM, et al. Post-stroke patients with moderate function have  
529 the greatest risk of falls: a National Cohort Study. *BMC Geriatr.* 2019;19(1):373.  
530 doi:10.1186/s12877-019-1377-7



531 14. Kerse N, Parag V, Feigin VL, et al. Falls after stroke: results from the Auckland Regional  
532 Community Stroke (ARCOS) Study, 2002 to 2003. *Stroke*. 2008;39(6):1890-1893.

533

534

535

536

537

538

539

540

541

542

543

544

545

546

547
