# Supplementary material
Source: PubMed Central journal article supplement (PMC8961396)
Supplement: jamaneurol-e220231-s002.pdf [file jamaneurol-e220231-s002.pdf]

## Supplemental Online Content

Waddell KJ, Patel MS, Clark K, Harrington TO, Greysen SR. Effect of gamification with social incentives on daily steps after stroke: a randomized clinical trial. *JAMA Neurol*. Published online March 28, 2022. doi:10.1001/jamaneurol.2022.0231

**eFigure 1.** Study CONSORT Diagram

**eFigure 2.** Reasons for Study Exclusion

This supplemental material has been provided by the authors to give readers additional information about their work.

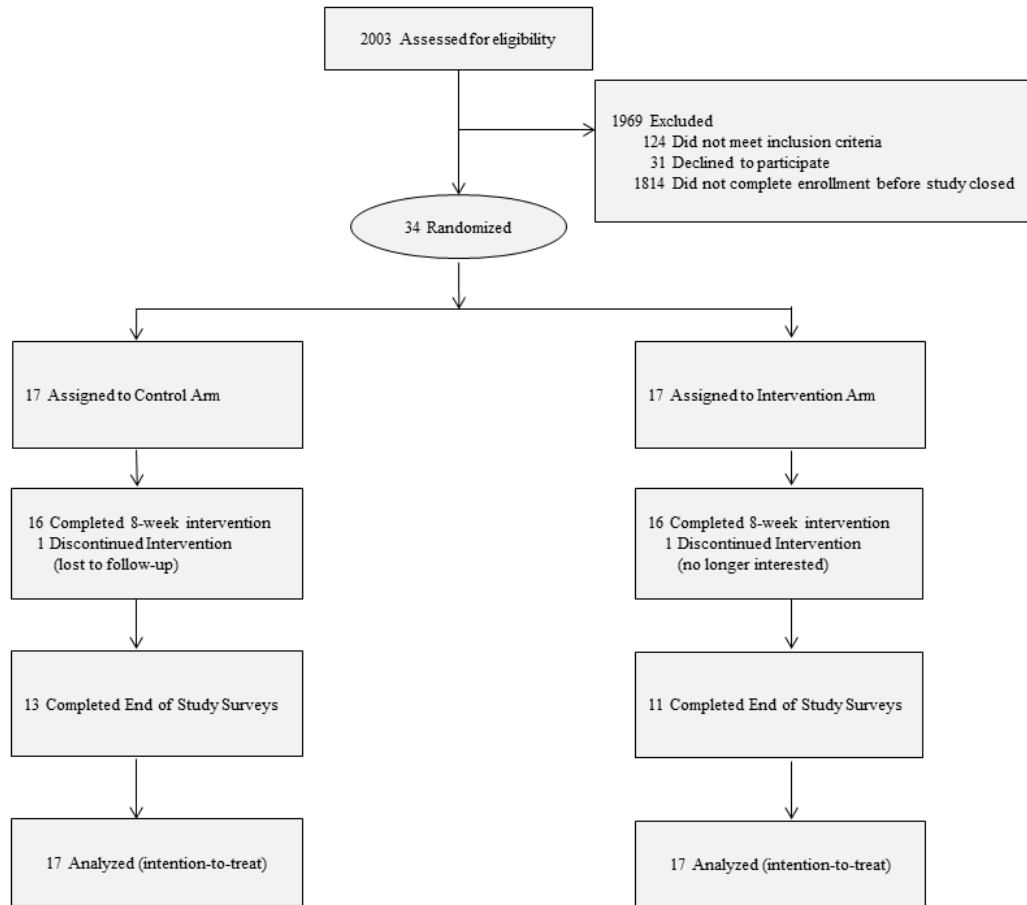

eFigure 1. Study CONSORT diagram

## Excluded detailed

|      |                                                                           |
|------|---------------------------------------------------------------------------|
| 1969 | Excluded                                                                  |
| 124  | Did not meet inclusion criteria                                           |
| 51   | Ineligible based on responses to enrollment survey                        |
| 1    | Did not have a smartphone                                                 |
| 7    | Self-reported high levels of physical activity                            |
| 1    | Reported no history of a stroke                                           |
| 2    | Currently receiving physical therapy services                             |
| 9    | Failed cognitive assessment                                               |
| 30   | Ineligible due to baseline step counts that were too high (> 7,500 steps) |
| 4    | In long-term care facilities                                              |
| 13   | Passed away                                                               |
| 6    | Had an excluded medical conditions                                        |
| 31   | Declined to participate                                                   |
| 4    | Declined to consent to study                                              |
| 27   | Participants declined to participate prior to randomization               |
| 1814 | Did not complete enrollment before study closed                           |
| 65   | Lost to follow-up                                                         |
| 1749 | No response                                                               |

eFigure 2. Reasons for study exclusion
