# Supplementary material
Source: PubMed Central journal article supplement (PMC8961396)
Supplement: jamaneurol-e220231-s003.pdf [file jamaneurol-e220231-s003.pdf]

## **Data Sharing Statement**

Waddell. Effect of Gamification With Social Incentives on Daily Steps After Stroke. *JAMA Neurol.* Published March 28, 2022. doi:10.1001/jamaneurol.2022.0231

### **Data**

**Data available:** No
